# Supplementary material for: Adsorption of Pyrene and Arsenite by Micro/Nano Carbon Black and Iron Oxide
Source: MDPI journal article supplement (doi:10.3390/toxics12040251), 2024-03-29
Supplement: s1 [file s1]

## Supplementary Materials

Table S1. Setup of Pre-Experiment.

| System Labels | Micro/nano hematite a (mg) | Micro/nano carbon black a (mg) | Pyrene (µg/L) | As (III) (mg/L) |
|---------------|----------------------------|--------------------------------|---------------|-----------------|
| IO-As         | 0-1000                     | 0                              | 0             | 10              |
| IO-Pyr        | 0-1000                     | 0                              | 80            | 0               |
| CB-Pyr        | 0                          | 0-1000                         | 80            | 0               |
| CB-As         | 0                          | 0-1000                         | 0             | 10              |

a 0-1000 refers to dosages of micro/nano hematite and carbon black ranged from 0 to 1000 mg (0, 5, 10, 25, 50, 100, 500, and 1000 mg)

Table S2. Adsorption isotherms of As(III) and pyrene reported in the literatures

| Adsorbent                                                                                     | Adsorbate | Initial concentration | Isotherm model    | qmax (mg/g) | References |
|-----------------------------------------------------------------------------------------------|-----------|-----------------------|-------------------|-------------|------------|
| Iron oxide nanoparticles                                                                      | As(III)   | 1–7 mg/L              | Langmuir          | 2.9 mg/g    | [37]       |
| Magnetite particles                                                                           | As(III)   | 2 mg/L                | Langmuir          | 3.70 mg/g   | [38]       |
| Fe <sub>3</sub> O <sub>4</sub> nanoparticles                                                  | As(III)   | 32.32 mg/L            | Langmuir          | 7.18 mg/g   | [39]       |
| Mixed $\alpha$ - Fe <sub>2</sub> O <sub>3</sub> and $\gamma$ - Fe <sub>2</sub> O <sub>3</sub> | As(III)   | 0–60 mg/L             | Langmuir          | 46.5 mg/g   | [30]       |
| Carbon Nanotubes                                                                              | pyrene    | 15 mg/L               | Dubinin-Ashtakhov | 42.7 mg/g   | [40]       |
| Activated Carbon                                                                              | pyrene    | 8 mg/                 | Langmuir          | 104.5 mg/g  | [41]       |
| regenerable graphene wool                                                                     | pyrene    | 300-800 ng/L          | Langmuir          | 20 mg/g     | [42]       |

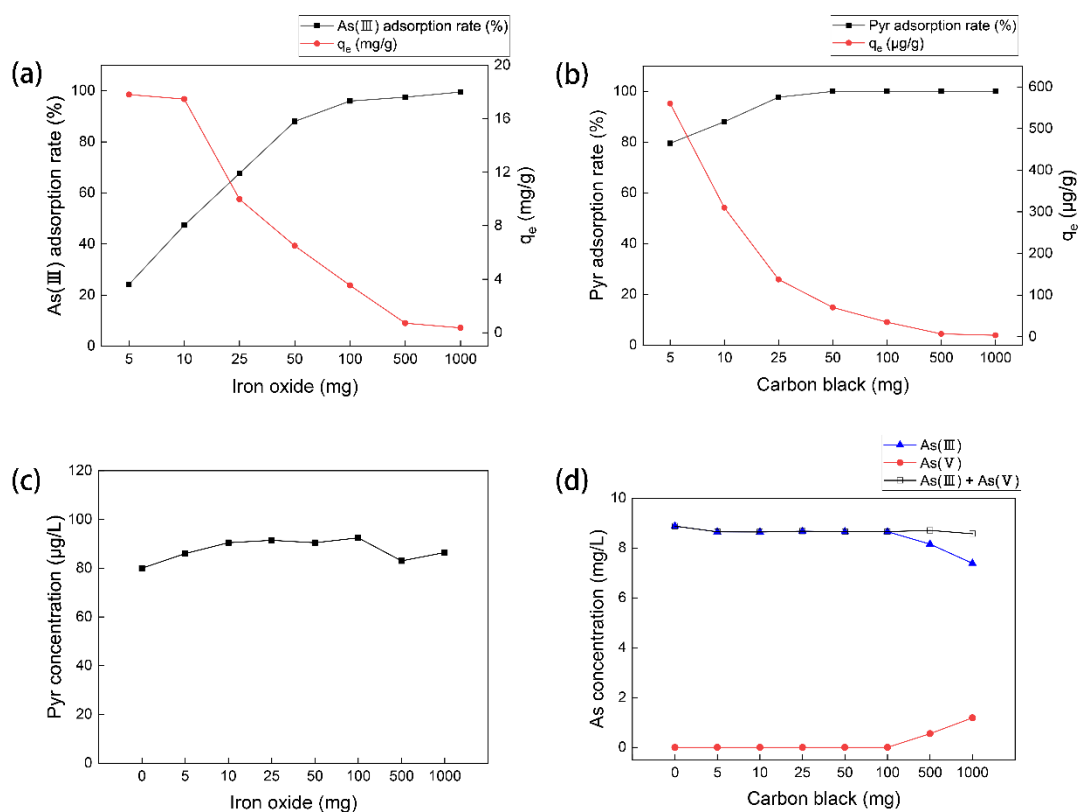

Figure S1. Adsorption of pyrene and As (III) by micro/nano carbon black and iron oxide.  
 (a) Adsorption rate and adsorption capacity of As (III) over the dosage of micro/nano iron oxide;  
 (b) Adsorption rate and adsorption capacity of pyrene over the dosage of micro/nano carbon black;  
 (c) Concentration of pyrene in the liquid over the dosage of micro/nano iron oxide;  
 (d) Concentration of f As in the liquid over the dosage of micro/nano carbon black.
